# Supplementary material for: Light-regulated and cell-specific methylation of the maize PEPC promoter
Source: PubMed Central journal article supplement — J Exp Bot. 2011 Dec 5;63(3):1381–90. doi: 10.1093/jxb/err367 (PMC3276097; doi:10.1093/jxb/err367), 2011-12-05
Supplement: supp_err367_69450_Supplementary_Figures_Table.pdf [file supp_err367_69450_Supplementary_Figures_Table.pdf]

### **Supplementary Figure 1. Gene Prediction in region 15 kb upstream of ZmPEPC1**

fgenesh Fri Jun 25 14:52:18 BST 2010

FGENESH 1.1 Prediction of potential genes in Monocot genomic DNA

Time : Fri Jun 25 14:52:18 2010

Seq name: 9 dna:chromosome chromosome:AGPv1:9:59729275:59750163:1

Length of sequence: 20889

Number of predicted genes 3 in +chain 2 in -chain 1

Number of predicted exons 14 in +chain 12 in -chain 2

Positions of predicted genes and exons:

| G Str | Feature | Start  | End   | Score  | ORF         | Length |
|-------|---------|--------|-------|--------|-------------|--------|
| 1+    | 1CDSf   | 46-    | 867   | 49.36  | 46-867      | 822    |
| 1+    | 2CDSI   | 942-   | 1688  | 35.11  | 942-1688    | 747    |
| 1+    | PolA    | 1736   |       | -1.56  |             |        |
| 2-    | PolA    | 1848   |       |        |             |        |
| 2-    | 1CDSI   | 2603-  | 3086  | 15.1   | 2603-3085   | 483    |
| 2-    | 2CDSf   | 3445-  | 6557  | 156.73 | 3447-6557   | 3111   |
| 2-    | TSS     | 6933   |       | -3.78  |             |        |
| 3+    | TSS     | 14107  |       | -4.48  |             |        |
| 3+    | 1CDSf   | 15359- | 15538 | 15.95  | 15359-15538 | 180    |
| 3+    | 2CDSi   | 15646- | 16040 | 54.86  | 15646-16038 | 393    |
| 3+    | 3CDSi   | 16156- | 16240 | 20.09  | 16157-16240 | 84     |
| 3+    | 4CDSi   | 17131- | 17353 | 22.14  | 17131-17352 | 222    |
| 3+    | 5CDSi   | 17802- | 17905 | 9.54   | 17804-17905 | 102    |
| 3+    | 6CDSi   | 18032- | 18122 | 6.66   | 18032-18121 | 90     |
| 3+    | 7CDSi   | 18260- | 18414 | 10.63  | 18262-18414 | 153    |
| 3+    | 8CDSi   | 18511- | 19509 | 124.51 | 18511-19509 | 999    |
| 3+    | 9CDSi   | 19607- | 19993 | 49.73  | 19607-19993 | 387    |
| 3+    | 10CDSI  | 20102- | 20395 | 39.05  | 20102-20395 | 294    |
| 3+    | PolA    | 20592  |       | 0.64   |             |        |

Supplementary Figure 2

Predicted protein(s):

> FGENESH: 1 2 exon (s) 46 - 1688 522 aa, chain +  
MTEALNEDEKEPSKKKIPKRRKASSPKQKISDEEETPASPSAPDVEEILKVMNESLPAKL  
SPLGPQLTKFFQKEKEPEKTKKTAKAKRQRIITVTEVIDKTPPRASAQKTPVAEEKTSIE  
ITPSEVAAAEEAASVEDLNLESTIEDIDKILLDMATEEAATAAEEAMAAPVPGKEKEIVDEA  
SEDEAFMFQNLVGEKLSKPEIEELKEYAKSCGYKPGALLFGGIDDEKLDICIQDQTGAKVI  
GTLSKSIGFPKLETDISRYRRQHIVGSLFYSNFKTMLLSKALKMQQDFEDKKHEVIENL  
ESKIKEQSAIEKKNFELQATEGLLAEAEAKITELNTKLLCQSEQFEQEKQELKAKLETE  
AQQNSDLKLLAGLQEKCLEFSNKCIQRLRKIFHSVGASSEKFTPSAEDLPKTFEHIIEGE  
IDELDEVIAGHGDFCAWVASRGTAAAFKAGCDHGKIVNRPNFTLSPSILDDIPDLARSI  
SNRFVKMIWTKGGREKAGDEARSHLEPVRNHTFCLPLPSSSI

> FGENESH: 2 2 exon (s) 2603 - 6557 1198 aa, chain -  
MASFNDQAGAASDPKLVLPITGGSCSEPANCKQKKEAQRVQHVGVQGPFIKSRWSHIPI  
TFSQEDLQLKDYTHNDAMVISCVIKGLVHNVLVDTGSAADIIFAKAFRQMQEPEDKIHD  
ATHPLCGFGGRQIVALGKITMSVTFGFINNTRTEQVVFIDVMEYPYNAIIGRGTLNAFE  
AIIHPAYLCMKIPSDQGPIAIIHGSQEAARRAKGNWTDKAIHNIDGAEACEQYKFRREKA  
ASADQPKPMLLCEDIAEQVLLGSQLSEEQEKTLIRFLFNNKDVFAWSANDLCGVNRDVI  
EHSLNVDPFRPRKQRLRKMSDDKAEGARNEVKRLLSAGVIREVKYPEWLANVMVKKAN  
GEWRMCIDFTDLNACPKDEFPLPRIDSLVDAASSELMSLLDCYSGYHQIWMKKEDEPK  
TSFITPSGTYCYLRMPEGLKNAGGSFSRMTAKVLQSQIGRNVLTYVDEIIVKSTKQENHI  
ADLQETFASFRQAGLKNPEKCVFGVKKGKFLGCLVSTKGIENPSKIEAILRMEPPTTK  
KGAQRLTGRLASLNRFSRSAERNLPFFEVLSAEVFWGSPSQKAFEELKQYLIDLTTL  
TPPTPGAPLLLVAASHSAVSAALVQEKLDGQVKKQVPVYFVSEVLSISKKNYTELEKVL  
YAVLMASRKLRYFQAYNIIVPSSQPLKDIMRNREATGRIGKWAELNEFCIDYVHRSSI  
QSQUALADFIADWTPGAQDEEINKDAEVWTVFWDGSWGTFGAGAAAVLVSPSKVKTCYAAR  
LDFSCTNNITEYEALLLGLRKLKAMGIRRAILKTDSQVVS GHIDK SCKAKDPKLEKYLDM  
VRRVEASFEGFSVKNIPRGQNEHADLLAKSAAQGLPLPSDVFFETIKAPSVELLERAVLN  
ISPVYSEDWRTEIISYLQGGKFLSDEETYNRRIEARARPYVMIEGELYKHGVCAPLLKCLS  
RTEGIELMKEIHAGLCESHIGSRPLLGVFRQGFYWPKAASDAAELVQKCEGCQKCARDQ  
KQPSSLTQLIQPIWPLQRGKWPDQLTKVWVSHNTTTSRSTGFTPFKLLFGDEAITPEEAK  
TGSIRVVASSESGSEDAYSMEKDALEGIQLQAVENINKYQAETIKWRDRKVRLKNIIEPGH  
LVLRRVANPDTVGKLQLKWGPFLVASSSRPGSYRLKMDMGNDIPRSWNADELRRYYV

> FGENESH: 3 10 exon (s) 15359 - 20395 970 aa, chain +  
MASTKAPGPGEKHHSIDAQLRQLVPGKVS EDDKLEIYDALLVDRFLNQLDLHGPSLREF  
VQECYEVSA DYEGKGD TTKL GELGAKLTGLAPADAILVASSILHMLNLANLAEVQIAHR  
RRNSKLLKGGFADEGSATTESDIEETLKR LVSEVGKSPEEVFEALKNQTVDLVFTAHTQ  
SARRSLLQKNARIRNCLTQLNAKDITDDDKQELDEALQREIQAAFRTDEIRRAQPTPQDE  
MRYGMSYIHETVWKGVPKFLRRVD TALKNIGINERLPYNVSLIRFSSWMMGGDRDGNPRVT  
PEVTRDVCLLARMMAANLYIDQIEELMFELSMWRCNDELRVRAEELHSSSGSKVTKYIE  
FWKQIPPNEPYRVILGHVRDKLYNTRERARHLLASGVSEISAESSFTSIEEFLEPLELCY  
KSLCDCGDKAIADGSLDLLRQVFTFGLSLVKLDIRQESERHTDVIDAITTHLGIGSYRE  
WPEDKRQEWLLSELRGKRPLLPDLPQTDEIADVIGAFHVLAELPPDSFGPYIISMATAP  
SDVLAVELLQRECGVRQPLPVVPLFERLADLQSAPASVERLFSVDWYMDRIK GKQQVMVG  
YSDSGKDAGRLSAWQLYRAQEEMAQVAKRYGVKLT LFHGRGGTVGRGGGPTH LAI LSQP

PDTINGSIRVTVQGEVIEFCFGEEHLCFQTLQRFTAATLEHGMHPPVSPKPEWRKLMD  
AVVATEEYRSVVVKEARFVEYFRSATPETEYGRMNIGSRPAKRRPGGGITT  
LRAIPWIFS  
WTQTRFHLPVWLGVGAAFKFAIDKDVRNFQVLKEMYNEWPF  
FRVTLDLLEMVFAKGD  
PGI  
AGLYDELLVAEELK  
PFGKQLRDKYVETQ  
QLLLQIAGHKDILE  
GDPFLKQGLVLRNP  
YITT  
LNVFQAYTLKRIRDP  
NFKVTPQPPLSKEF  
ADENKPAGLVKLN  
PASEYPPGLEDTL  
ILTMK  
GIAAGMQNTG

### Supplementary Figure 3. Gene Prediction in region 50 kb upstream of ZmPEPC1

fgenesh Fri Jun 25 14:54:29 BST 2010

FGENESH 1.1 Prediction of potential genes in Monocot genomic DNA

Time : Fri Jun 25 14:54:30 2010

Seq name: 9 dna:chromosome chromosome:AGPv1:9:59694275:59750163:1

Length of sequence: 55889

Number of predicted genes 8 in +chain 7 in -chain 1

Number of predicted exons 35 in +chain 33 in -chain 2

Positions of predicted genes and exons:

| G Str | Feature | Start | End   | Score  | ORF         | Length |
|-------|---------|-------|-------|--------|-------------|--------|
| 1+    | TSS     | 3327  |       | -1.68  |             |        |
| 1+    | 1CDSf   | 5120  | 5296  | 4.31   | 5120-5296   | 177    |
| 1+    | 2CDSi   | 5310  | 5372  | 1.38   | 5310-5372   | 63     |
| 1+    | 3CDSi   | 5487  | 5768  | 20.58  | 5487-5768   | 282    |
| 1+    | 4CDSi   | 7372  | 7461  | 3.39   | 7372-7461   | 90     |
| 1+    | PolA    | 7484  |       | 0.64   |             |        |
| 2+    | TSS     | 8734  |       | -1.68  |             |        |
| 2+    | 1CDSf   | 9384  | 11747 | 130.81 | 9384-11747  | 2364   |
| 2+    | 2CDSi   | 11782 | 11938 | 10.52  | 11782-11937 | 156    |
| 2+    | 3CDSi   | 12065 | 13041 | 43.04  | 12067-13041 | 975    |
| 2+    | 4CDSi   | 13164 | 14795 | 79.04  | 13164-14795 | 1632   |
| 2+    | PolA    | 15421 |       | 0.64   |             |        |
| 3+    | TSS     | 16511 |       | -1.68  |             |        |
| 3+    | 1CDSf   | 17146 | 17171 | 0.81   | 17146-17169 | 24     |
| 3+    | 2CDSi   | 17747 | 17877 | 7.4    | 17748-17876 | 129    |
| 3+    | 3CDSi   | 17936 | 18057 | 1.68   | 17938-18057 | 120    |
| 3+    | 4CDSi   | 18609 | 18794 | 4.63   | 18609-18794 | 186    |
| 3+    | 5CDSi   | 18867 | 18936 | 12.59  | 18867-18935 | 69     |
| 3+    | 6CDSi   | 19415 | 19539 | 4.98   | 19417-19539 | 123    |
| 3+    | 7CDSi   | 19544 | 19675 | -3.45  | 19544-19675 | 132    |
| 3+    | PolA    | 19983 |       | 0.64   |             |        |
| 4+    | TSS     | 21769 |       | -2.48  |             |        |
| 4+    | 1CDSf   | 22615 | 22924 | 9.87   | 22615-22923 | 309    |
| 4+    | 2CDSi   | 22979 | 23067 | -2.5   | 22981-23067 | 87     |
| 4+    | PolA    | 23456 |       | 0.64   |             |        |
| 5+    | TSS     | 28343 |       | -6.58  |             |        |
| 5+    | 1CDSf   | 29814 | 30291 | 26.59  | 29814-30290 | 477    |
| 5+    | 2CDSi   | 30432 | 30577 | 1.77   | 30434-30577 | 144    |
| 5+    | PolA    | 32993 |       | 0.64   |             |        |
| 6+    | TSS     | 33642 |       | -0.98  |             |        |
| 6+    | 1CDSf   | 33835 | 34119 | 21.07  | 33835-34119 | 285    |
| 6+    | 2CDSi   | 34272 | 34788 | 10.93  | 34272-34787 | 516    |

|    |        |       |       |        |             |      |
|----|--------|-------|-------|--------|-------------|------|
| 6+ | 3CDSi  | 34912 | 35867 | 51.95  | 34914-35867 | 954  |
| 6+ | 4CDSi  | 35942 | 36688 | 35.11  | 35942-36688 | 747  |
| 6+ | PolA   | 36736 |       | -1.56  |             |      |
| 7- | PolA   | 36848 |       | -1.56  |             |      |
| 7- | 1CDSi  | 37603 | 38086 | 15.1   | 37603-38085 | 483  |
| 7- | 2CDSf  | 38445 | 41557 | 156.73 | 38447-41557 | 3111 |
| 7- | TSS    | 41933 |       | -3.78  |             |      |
| 8+ | TSS    | 49107 |       | -4.48  |             |      |
| 8+ | 1CDSf  | 50359 | 50538 | 15.95  | 50359-50538 | 180  |
| 8+ | 2CDSi  | 50646 | 51040 | 54.86  | 50646-51038 | 393  |
| 8+ | 3CDSi  | 51156 | 51240 | 20.09  | 51157-51240 | 84   |
| 8+ | 4CDSi  | 52131 | 52353 | 22.14  | 52131-52352 | 222  |
| 8+ | 5CDSi  | 52802 | 52905 | 9.54   | 52804-52905 | 102  |
| 8+ | 6CDSi  | 53032 | 53122 | 6.66   | 53032-53121 | 90   |
| 8+ | 7CDSi  | 53260 | 53414 | 10.63  | 53262-53414 | 153  |
| 8+ | 8CDSi  | 53511 | 54509 | 124.51 | 53511-54509 | 999  |
| 8+ | 9CDSi  | 54607 | 54993 | 49.73  | 54607-54993 | 387  |
| 8+ | 10CDSi | 55102 | 55395 | 39.05  | 55102-55395 | 294  |
| 8+ | PolA   | 55592 |       | 0.64   |             |      |

Supplementary Figure 4

Predicted protein(s):

> FGENESH: 1 4 exon (s) 5120 - 7461 203 aa, chain +  
MLQQQQASKSLASAWRGGVLEQRSVRDLMSGGADEETRRSWSCARLWLLVVCALTSLS  
PSPPGSPTTPTEDSRPYMLEGAFTHQDFAGHKGTIRTGDVQWMTAGRGIVHSEMPAGDDV  
HKGLQLWINLSSKYKMIEPQYQELERKDISRGESENGGVEALGVATPVYTHPHHEAMLRR  
LSDATMEQSNNSDSSIDERSIQP

> FGENESH: 2 4 exon (s) 9384 - 14795 1709 aa, chain +  
MDPKGKGIVINDKEKESFVNEPKDDKPTDSGSGQRRKEGKKKKTRRIKEIVYYDSDESTS  
SQKDEDHNDYERRKPVNSNFSFDYSRIPQSSHSHLLSIPLGKPPHFDGEDYGFWSHKMRS  
HLFSLHPSIWEIVESGMHFDSSDPMFINEQIHKNAQATTVLLASLCRNEYHKVSGLDNA  
KQIWDTLKISHEGNDVTLTKMELVEGELGRFAMIRGEEPTQTYNRLKTLINKIRSYGST  
RWTDDHDVRLMLRSFTVLDPHLVNNIRENPRYTKMSPEEVLGKFVSGRMMIKEYARYVDDA  
LNGPINEPQPLALKATRSKEALPSKVAQIEAAGLNDEEMALIIKRFKALNGRKGQPSKT  
KTKGKRSCFKCGKLGHFIANCPDNE SDQEKGNKREKKKQYKKAKGEAHLGKEWSDCSSS  
DSDNEGLAATAFNKSALFPNERLTCLMAREKKVSTQDSTYASSDSESSDDIDYSCLFK  
GLDRSKIDKINELIDALNEKDRLLEKQEDLLYDEHDKFVEAQKSYALEVKRNEMLSYELS  
TCHETISTLQGVNNDLNAKLEVANKSNSCVEHVKICTRCKDFDVDACSEHLVLISKLNKE  
VASLNAQLKTSKNEVDKIKFARDAYTVGRHPSIKDGLGFKREAKNLTSHKAPIFVKEKGG  
APMASNAKKNHAFMYDRRNARNAYNDIDSHVYDASHAMFASSSSYKHDRDMPRRNIAHVP  
RKNVIHAPRKVENEPSIIYCALNTSFAICRKRKIVARKLGAKCKGDRTCIWVPKDICAN  
LAGPNMSWVYASGSSWIIDSGCTNHMTGEKKMFTSYVKNKDSQDSIIFGDGNQGVKGL  
DVSVFRRSDGSLAFKGVLDGKLYLVDFAKEEAGLDACLMAKTCMGWLWHRRLAHVGMKNL  
HKLLKGEHVIGL TNVQFEKDRPCAACQAGKQVGGAAHHSKNVMTTSRPLELLHMDLFGPVA  
YLSIGGSKYGLVIVDDFSRFTWVFFLQDKSETQGT LKRFLRRAQNEFELKVKKIRSDNGS  
EFKNLQVEEFLEEEGIKHEFSAPYTPQQNGVVERKNRTLIDMARTMLGEFKTPECFWTEA  
VNTACHAINRVYLHRL LKTSYELLTGNKPNVSYFRVFGSKCYILVKKGRNSKFAPKAVE  
GFL LGFMTSNTQGR LRKSSNKSIGVLAGYNENIGDMEKVAAPGTQVGQDHPSSSIMVNP  
TQDDEQVHHKEACDQGAQDDQVIEEAAHPAPTQVRAMIQRDHPVDQILGDISKGVTR  
SRLVNFCEHYSFVSSIEPFRVEEALLDPDWVLAMQEELNFKRNEVWTLVPRPKQNVVGT  
KWFVRNKQDEHGVTRNKARLVAKGYAQAAGLDFEETFAPVARLESIRILLAYAAHHSFR  
LFQMDVKS AFLNGPIKEEVYVEQPPGFEDERYPDHVCKLSKALYGLKQAPRAWYECLRDF  
LIANAFKVGKADPTLFTKTCNGDLFVCQIYVDDIIFGSTNQKSCEEF SRVMTQKFEMSM  
GELNYFLGFQVKQLKDGTFISQTKYTQDLLKRFGMKDAKPAKTPMGTDGHTDLNKGKSV  
DQKAYRSMIGSLLYLCASRPDIMLSVCMCARFQSDPKECHLVAVKRILRYLVATPCFGLW  
YPKGSTFDLVGYSDDYAGCKVDRKSTSGTCQFLGRSLVSWNSKKQTSVALSTAEARVCC  
RRTVLRATTLDEANPQGLWLQSEQSPTPM

> FGENESH: 3 7 exon (s) 17146 - 19675 263 aa, chain +  
MGANCSTGFVQMLIPICLTLTLNPAENIQDANMEEQQSSLVDGLKTPTTVAGKLFLKI  
KNPQPWSACPTLHPIIIVTCGSVMEITNLLSVTHNVTKELIKYHSQTLGYVIGGTNMR  
DTNHLTEGINIL IATLDRLLDHLQNTGSFKYKELKSTKKVMPDDKLAEFALLDPKPPRGV  
LKDVAGCDNAKQEIREFVHLFKNPKKYEDFGAKIPKGALLVILGHGSLCLPKLQQESGVP  
FFVYFQFKFYGNVGLCWTIQATT

> FGENESH: 4 2 exon (s) 22615 - 23067 132 aa, chain +  
MENKRELEGEIKRKATNQQARSSTRPRYATPQGT PAHGSPRQQSQVQSTPQASISVGL

VAPNASTNGSCFKCGQVGHYTNPCPNKAPYTTTPASMKQGQVSGEAEPEGPKYLEEVPREA  
EEASEEGNEQQN

> FGGENESH: 5 2 exon (s) 29814 - 30577 207 aa, chain +  
MALFIKLRRFQYISFASGSSGLGIDKRHHGCRSHVLPGVVEVLRTVVALSDLIKNLPRSR  
PFIFKASLLNVVNPVEPLNKCIKVL LLLLLLEGLVSEENARLALALVFFFLLDGVPPVPSL  
LPRGGVSTKQALSGTTSESKPSSIEELLKSSRRSRMDIGGTPGPRDYGIGLILANGAEF  
AGLLGEEVEGAKSDLAAWNE SLTPGGR

> FGGENESH: 6 4 exon (s) 33835 - 36688 834 aa, chain +  
MARVRSTARVEREGDEADGSETVPISEAMQRSGLVTSEKIPSEDAEQAEQAMAEAEEDDI  
EETDPEDDYRIAMPSPKSHLDFGKSTVSKADLSKMVLKRFGIYFHQLTPNAIVRLNVYIWI  
ALRSQAVEPFA DSFCRVHELHYQTKARKDGLHDNFGCYNFAYRKTTFKFPVISYRSKWAAG  
WKSEWFYVKVDDDKLQVSPLELIFGETRPRCNMTPEGPTQQALNEFRIIAEHISTRDL  
VQEF LAFKVFPSLKEWEMPKLKGEKKEEDQLMTAAFGRPKRRLNRVLDALGFEYDPYEN  
LNKGVGGQKRKRMTEALNEDEKESKKKIPKRRKASSPKQKISDEEETPASPSAPDVEEI  
LKVMNESLPAKLSPLGPQLTKFFQKEKEPEKTKKTAKAKRQRIITVTEVIDKTPPRASAQ  
KTPVAEEKTSIEITPSEVAAEAASVEDLNLESTIEDIDKILLDMATEEAATAAEEMAA  
VPGKEKEIVDEASEDEAFMFQNLVGEKLSKPEIEELKEYAKSCGYKPGALLFGGIDDEKL  
DCIQDQTGAKVIGT LSKSIGFPKLETDISRYRRQHIVGSLFYSNFKTMLLSKALKMQQDF  
EDKKHEVIEENLESKIKEQSAIEKKNFELQATEGLLAEAEAKITELNTKLLCQSEQFEQ  
EKQELKAKLETEAQNSDLKLLAGLQEKCLEFSNKCIQRLRKIFHSVGASSEKFTPSAE  
DLPKTFEHIIEGEIDELDEVIAGHGDFCAWVASRGTAA AFLKAGCDHGKIVNRPNFTLSPS  
ILDDIPDLARSISNRFVKMIWTKGGREKAGDEARSHLEPVRNHTFCLPLPSSSI

> FGGENESH: 7 2 exon (s) 37603 - 41557 1198 aa, chain -  
MASFNDQAGAASDPKLVLPITGGSCSEPA NKQKKEAQR RVQHVGVQGPFIKSRWSHIPI  
TFSQEDLQLKDYTHNDAMVISCVIKGFLVHNVLVD TGSAADIIFAKAFRQM QEPEDKIHD  
ATHPLCGFGGRQIVALGKITMSVTFGF INNTRTEQV VFDIVDMEYPYNAIIGRGT LNAFE  
AIIHPAYLCMKIPSDQGPIA IHGSQEAARRAKGNWTD SKAIHNIDGAEACEQYKFRREKA  
ASADQPKPMLLCEDIAEQVLLGSQLSEEQEKTLIRFLFNNKDVFAWSANDLCGVNRDVI  
EHSLNVDP SFRPRKQRLRKMSDDKAEGARNEVKRLLSAGVIREVKYPEWLANTVMVKKAN  
GEWRMCIDFTDLNKACPKDEFPLPRIDSLV DAAASSELMSLLDCYSGYHQIWMKKEDEPK  
TSFITPSGTYCYLRMPEGLKNAGGSFSRMTAKVLQSQIGRNVLT YVDEIIVKSTKQENHI  
ADLQETFA SFRQAGLKL NPEKCVFGVKKGKFLGCLVSTK GIEANPSKIEAILRMEPPTTK  
KGAQRLTGR LASLNRFISRSAERNLPFFEV LKSAEVFQWGPSQQKAFEELKQYLIDL TTL  
TPPTPGAPLLL YVAASHSAVSAALVQEKLDGQVKKQVPVYFVSEVLSISKKNYTELEKVL  
YAVLMASRKL RHYFQAYNIVVPSSQPLKDIMRNREATGRIGKWA AEELNEFCIDYVHRSSI  
QSQUALADFIADWTPGAQDEEINKDAEVWTFVWDG SWGTFGAGAAAVLVSPSKVKT CYAAR  
LDFSCTNNITEYEALLLGLRKLKAMGIRRAILKTDSQV VSGHIDK SCKAKDPKLEKYLD M  
VRRVEASFEGFSVKNIPRGQNEHADLLAKSAAQGLPLPSD VFFETIKAPSVELLERAVLN  
ISPVYSEDWRTEIISYLQ GKFLSDEETYNRRIEARARPYVMIEGELYKHGVCAPLLKCLS  
RTEGIELMKEIHAGLCE SHIGSRPLLKGVFRQGFYWPKAASDAAELVQKCEGCQKCARDQ  
KQPSSLTQLIQI WPLQRGKWPDQLTKVVWSHNTTTSRSTGFTPFKLLFGDEAITPEEAK  
TGSIRVASSES GSEDAYSMEKDALE GIRLQAVENINKYQAETIKWRDRKVRLKNIIEPGH  
LVLRRVANPDTVGLQLKWE GPFLVASSSRPGSYRLKMDMGNDIPRSWNADEL RRYV

> FGGENESH: 8 10 exon (s) 50359 - 55395 970 aa, chain +  
MASTKAPGPGEKHHSIDAQLRQLVPGKVS EDDKLEIYDALLVDRFLNILQDLHGPSLREF  
VQECYEV SADYEGKGD TTKL GELGAKLTGLAPADAILVASSILHMLNLANLAEVQIAHR

RRNSKLLKGGFADEGSATTESDIEETLKRLVSEVGKSPEEVFEALKNQTVDLVFTAHTQ  
SARRSLLQKNARIRNCLTQLNAKDITDDDKQELDEALQREIQAAFRTDEIRRAQPTPQDE  
MRYGMSYIHETVWKGVPKFLRRVDTALKNIGINERLPYNVSLIRFSSWGGDRDGNPRVT  
PEVTRDVCLLARMMAANLYIDQIEELMFELSMWRCNDELRVRAEELHSSSGSKVTKYIE  
FWKQIPPNEPYRVILGHVRDKLYNTRERARHLLASGVSEISAESSFTSIEEFLEPLELCY  
KSLCDCGDKAIADGSLDLRQVFTFGLSLVKLDIRQESERHTDVIDAITTHLGIGSYRE  
WPEDKRQEWLLSELRGKRPLLPDLPQTDEIADVIGAFHVLAEPPDSFGPYIISMATAP  
SDVLAVELLQRECGVRQPLPVVPLFERLADLQSAPASVERLFSVDWYMDRIKQKQVMVG  
YSDSGKDAGRLSAAWQLYRAQEEMAQVAKRYGVKLTLFHGRGGTVGRGGGPTHLAISQP  
PDTINGSIRVTVQGEVIEFCFGEHLCFQTLQRFTAATLEHGMHPPVSPKPEWRKLMDM  
AVVATEEYRSVVVKEARFVEYFRSATPETEYGRMNIGSRPAKRRPGGGITTLRAIPWIFS  
WTQTRFHLPVWLGVAAFKFAIDKDVRNFQVLKEMYNEWPFRRVTLDLLEMVFAKGDPI  
AGLYDELLVAEELKPFQKQLRDKYVETQQLLQIAGHKDILEGDPFLKQGLVLRNPYITT  
LNVFQAYTLKRIRDPNFKVTPQPPLSKEFADENKPAGLVKLNPASEYPPGLEDTLILTMK  
GIAAGMQNTG



**Supplementary Table 1. Primers used for bisulphite sequencing**

| Primer          | Gene         | Orientation/Strand | Primer Sequence (5'-3')                           | Region Amplified | Region Interrogated | Code |
|-----------------|--------------|--------------------|---------------------------------------------------|------------------|---------------------|------|
| PvuII control F | <i>PEPC1</i> | Sense Top          | GATTATTTACCCTAGAGCAATG                            | -3197 to -2906   | -3197 to -2906      | A    |
| PvuII control R | <i>PEPC1</i> | Sense Bottom       | CATGCCACAACATGTGTATGT                             |                  |                     |      |
| ZmPEPC ST       | <i>PEPC1</i> | Sense Top          | GATTATTTATTTTAGAGTAATGTAAGTTATGTGTATGATTT         | -3319 to -2973   | -3178 to -2908      | A    |
| ZmPEPC SB       | <i>PEPC1</i> | Sense Bottom       | ACTCCACRACATACATAACCACAACATATATATATAA             |                  |                     |      |
| ZmPEPC ST CE    | <i>PEPC1</i> | Sense Top          | TTGTATTGTATTGTGTTGTATATGGGAAAATTGAGAATTGTATTATGTT | -1320 to -852    | -1270 to -888       | B    |
| ZmPEPC SB CE    | <i>PEPC1</i> | Sense Bottom       | AATAAAAATATTATTCTACCAAACACCCRACAAA                |                  |                     |      |
| ZmPEPC ST LRB   | <i>PEPC1</i> | Sense Top          | TATTTTTGTGGTTTGTGTAYGGTYGGYGT                     | -932 to -501     | -902 to -551        | C    |
| ZmPEPC SB PAU   | <i>PEPC1</i> | Sense Bottom       | ATCTAAAAAATATAACRATAATCTATTTACAAAATATAATTAAAA     |                  |                     |      |
| ZmPEPC ST LRA   | <i>PEPC1</i> | Sense Top          | TTGAATATTTATTTGGAAATAATAAATGTTGAGTTTTTAATT        | -817 to -373     | -855 to -334        | D    |
| ZmPEPC SB LRA   | <i>PEPC1</i> | Sense Bottom       | CTCACCTACCTTCTATATTATTCCRTAACTAATTAAA             |                  |                     |      |
| ZmPEPC ST PEP-I | <i>PEPC1</i> | Sense Top          | GTGTTTATTGTATTTTAAATTATATTTGTAAATAGATATTT         | -565 to -144     | -521 to -176        | E    |
| ZmPEPC SB PEP-I | <i>PEPC1</i> | Sense Bottom       | CCRACTACRACATAAACTCCTTTTTAACTAA                   |                  |                     |      |
| ZmPEPC ST ATG   | <i>PEPC1</i> | Sense Top          | TYGTTAATAGTAGTAAGTTAAGTTAAAAAGGAGTT               | -193 to +188     | -158 to +155        | F    |
| ZmPEPC SB ATG   | <i>PEPC1</i> | Sense Bottom       | ATAAACTTATCRTCCTCRAAACCTTACCTAAA                  |                  |                     |      |

\*Cytosines converted to thymines are indicated in blue. Degenerate bases in red.
